# Supplementary material for: Different topologies in three manganese-μ-azido 1D compounds: magnetic behavior and DFT-quantum Monte Carlo calculations
Source: Royal Society of Chemistry journal article supplement (doi:10.1039/c5dt03034j), 2015-01-01
Supplement: c5dt03034j1.pdf [file c5dt03034j1.pdf]

## Supporting Information

**Table S1.** Reported Mn(II) end-on azido compounds (labeled with the CSD REFCODE) showing the Mn-N-Mn bond angles (in degrees) and the experimental exchange coupling constants  $J$  ( $\text{cm}^{-1}$ ) for such compounds.

| CSD REFCODE      | Mn-N-Mn | J    | ref |
|------------------|---------|------|-----|
| <b>Dinuclear</b> |         |      |     |
| RIHQOQ           | 101.20  | 0.12 | 1   |
| RIHQUW           | 98.31   | 2.11 | 1   |
| CIBPAF           | 103.78  | 2.22 | 2   |
| FIBJIK           | 103.11  | 2.41 | 3   |
| HEMPIY           | 104.61  | 1.31 | 4   |
| LIMLAV           | 100.38  | 3.84 | 5   |
| PIVRAO           | 105.29  | 3.09 | 6   |
| QULGAG           | 102.01  | 1.54 | 7   |
| RALKAR           | 102.00  | 4.08 | 8   |
| RALKEV           | 104.29  | 3.50 | 8   |
| RALKIZ           | 103.58  | 1.40 | 8   |
| RASHID           | 101.42  | 2.20 | 9   |
| RASHOJ           | 102.54  | 2.54 | 9   |
| RASHUP           | 102.62  | 2.54 | 9   |
| SEJPIH           | 100.28  | 1.94 | 10  |
| <b>Chain</b>     |         |      |     |
| ARUJON           | 101.82  | 3.15 | 11  |
| CUCDUZ           | 101.39  | 3.30 | 12  |
| CUQDAT           | 100.47  | 0.80 | 12  |
| ECAJAU           | 101.98  | 2.90 | 13  |
| HADDIB           | 102.67  | 1.18 | 14  |
| LISQOT           | 100.01  | 1.57 | 15  |
| ACOKIN           | 106.16  | 4.07 | 16  |
| DEYMOJ           | 98.80   | 1.20 | 17  |

## References SI

1. H.Hosseini-Monfared; R.Bikas; Sanchiz, J.; Lis, T.; M.Siczek; Tucek, J.; R.Zboril; P.Mayer, *Polyhedron* **2013**, *61*, 45.
2. Jia, H.-P.; Li, W.; Ju, Z.-F.; Zhang, J., *Inorg.Chem.Commun.* **2007**, *10*, 397.
3. Liu, C.-M.; Gao, S.; Zhang, D.-Q.; Liu, Z.-L.; Zhu, D.-B., *Inorg.Chim.Acta* **2005**, *358*, 834.
4. R.Cortes; J.L.Pizarro; L.Lezama; M.I.Arriortua; T.Rojo, *Inorg.Chem.* **1994**, *33*, 2697.
5. Wu, H.-Y.; An, H.-Q.; Zhu, B.-L.; Wang, S.-R.; Zhang, S.-M.; Wu, S.-H.; Huang, W.-P., *Inorg.Chem.Commun.* **2007**, *10*, 1132.
6. Yu, M.-M.; Ni, Z.-H.; Zhao, C.-C.; Cui, A.-L.; Kou, H.-Z., *Eur.J.Inorg.Chem.* **2007**, 5670.
7. Meng, Z.-S.; Yun, L.; Zhang, W.-X.; Hong, C.-G.; R.Herchel; Ou, Y.-C.; Leng, J.-D.; Peng, M.-X.; Lin, Z.-J.; Tong, M.-L., *Dalton Trans.* **2009**, 10284.
8. T.K.Karmakar; B.K.Ghosh; A.Usman; Fun, H.-K.; E.Riviere; T.Mallah; G.Aromi; S.K.Chandra, *Inorg.Chem.* **2005**, *44*, 2391.
9. Ni, Z.-H.; Kou, H.-Z.; Zheng, L.; Zhao, Y.-H.; Zhang, L.-F.; Wang, R.-J.; Cui, A.-L.; O.Sato, *Inorg.Chem.* **2005**, *44*, 4728.
10. Ge, C.-H.; Cui, A.-L.; Ni, Z.-H.; Jiang, Y.-B.; Zhang, L.-F.; J.Ribas; Kou, H.-Z., *Inorg.Chem.* **2006**, *45*, 4883.
11. Wang, Y.-Q.; Jia, Q.-X.; Wang, K.; Cheng, A.-L.; Gao, E.-Q., *Inorg.Chem.* **2010**, *49*, 1551.
12. M.A.Youssef; A.Escuer; M.A.S.Goher; F.A.Mautner; R.Vicente, *J.Chem.Soc.,Dalton Trans.* **2000**, 413.
13. T.K.Karmakar; G.Aromi; B.K.Ghosh; A.Usman; Fun, H.-K.; T.Mallah; U.Behrens; X.Solans; S.K.Chandra, *J.Mater.Chem.* **2006**, *16*, 278.
14. Wang, Y.-Q.; Sun, Q.; Yue, Q.; Cheng, A.-L.; Song, Y.; Gao, E.-Q., *Dalton Trans.* **2011**, *40*, 10966.
15. M.A.S.Goher; J.Cano; Y.Journaux; M.A.M.Abu-Youssef; F.A.Mautner; A.Escuer; R.Vicente, *Chem.-Eur.J.* **2000**, *6*, 778.
16. A.Das; G.M.Rosair; Fallah, M. S. E.; J.Ribas; S.Mitra, *Inorg.Chem.* **2006**, *45*, 3301.
17. J.L.Manson; A.M.Arif; J.S.Miller, *Chem.Commun.* **1999**, 1479.
